# Supplementary material for: Three-dimensional decellularized tumor extracellular matrices with different stiffness as bioengineered tumor scaffolds
Source: PubMed Central journal article supplement — Bioact Mater. 2021 Feb 15;6(9):2767–82. doi: 10.1016/j.bioactmat.2021.02.004 (PMC7897907; doi:10.1016/j.bioactmat.2021.02.004), 2021-02-15
Supplement: mmc1.pdf [file mmc1.pdf]

## **Supporting Information**

# **Three-dimensional decellularized tumor extracellular matrices with different stiffness as bioengineered tumor scaffolds**

Yonggang Lv<sup>a,b,\*</sup>, Hongjun Wang<sup>a,b</sup>, Gui Li<sup>a,b</sup>, Boyuan Zhao<sup>a,b</sup>

<sup>a</sup>Mechanobiology and Regenerative Medicine Laboratory, Bioengineering College, Chongqing University, Chongqing 400044, P. R. China

<sup>b</sup>Key Laboratory of Biorheological Science and Technology (Chongqing University), Ministry of Education, Bioengineering College, Chongqing University, Chongqing 400044, P. R. China

### **\*Corresponding author:**

Dr. Yonggang Lv, Professor

Mechanobiology and Regenerative Medicine Laboratory  
Bioengineering College, Chongqing University  
174 Shazheng Street, Shapingba District, Chongqing 400044, China  
Tel: 86-23-65102507  
Fax: 86-23-65102507  
E-mail: [yglv@cqu.edu.cn](mailto:yglv@cqu.edu.cn)  
Web: <http://yglvbme.com>

## Supplementary information for the sequence of LOX gene

The sequence of LOX gene:

```
ATGCGCTTCGCCTGGACCGTGCTCCTGCTCGGGCCTTTGCAGCTCTGCGCGCTAGT
GCACTGCGCCCCCTCCCGCCGCCGGCCAACAGCAGCCCCCGCGCGAGCCGCCGGCGGC
TCCGGGCGCCTGGCGCCAGCAGATCCAATGGGAGAACAACGGGCAGGTGTTTCAGCTT
GCTGAGCCTGGGCTCACAGTACCAGCCTCAGCGCCGCCGGGACCCGGGCGCCGCCGT
CCCTGGTGCAGCCAACGCCTCCGCCCAGCAGCCCCGCACTCCGATCCTGCTGATCCGC
GACAACCGCACCGCCGCGGGCGGAACGCGGACGGCCGGTCTCATCTGGAGTACCGCT
GGCCGCCCCAGGCCACCGCCCGTCACTGGTTCCAAGCTGGTACTCGACATCTAGAG
CCCGCGAAGCTGGCGCCTCGCGCGCGGAGAACCAGACAGCGCCGGGAGAAGTTCCTG
CGCTCAGTAACCTGCGGCCGCCAGCCGCGTGGACGGCATGGTGGGCGACGACCCTTA
CAACCCCTACAAGTACTCTGACGACAACCCTTATTACA ACTACTACGATACTTATGAAA
GGCCAGACCTGGGGGAGGTACCGGCCGATACTGGCACTGGTACTTCCAGTACGG
TCTCCCAGACCTGGTGGCCGACCCCTACTACATCCAGGCGTCCACGTACGTGCAGAAG
ATGTCCATGTACAACCTGAGATGCGCGGGAGGAAA ACTGTCTGGCCAGTACAGCAT
ACAGGGCAGATGTCAGAGATTATGATCACAGGGTGCTGCTCAGATTTCCCAAAGAGT
GAAAAACCAAGGGACATCAGATTTCTTACCCAGCCGACCAAGATATTCCTGGGAATGG
CACAGTTGTCATCAACATTACCACAGTATGGATGAGTTTAGCCACTATGACCTGCTTGAT
GCCAACACCCAGAGGAGAGTGGCTGAAGGCCACAAAGCAAGTTTCTGTCTTGAAGAC
ACATCCTGTGACTATGGCTACCACAGGCGATTTGCATGTA CTGCACACACAGGGATT
GAGTCTGGCTGTTATGATACCTATGGTGCAGACATAGACTGCCAGTGGATTGATATTAC
AGATGTAAAACCTGGAAACTATATCCTAAAGGTCAGTGTA AACCCAGCTACCTGGTTC
CTGAATCTGACTATACCAACAATGTTGTGCGCTGTGACATTCGCTACACAGGACATCAT
GCGTATGCCTCAGGCTGCACAATTCACCGTATTAG
```

## Supplementary Table

**Table S1** PCR primer sequences.

| Gene  | Primer sequences (5'→3')                                                           |
|-------|------------------------------------------------------------------------------------|
| LOX   | Forward: 5'-GCATACAGGGCAGATGTCAGA-3'<br>Reverse: 5'-TTGGCATCAAGCAGGTCATAG-3'       |
| ABCB1 | Forward: 5'-TTGCTGCTTACATTCAGGTTTCA-3'<br>Reverse: 5'-AGCCTATCTCCTGTCGCATTA-3'     |
| ABCC3 | Forward: 5'-ATTCCAACCAACGGAGCTGTG-3'<br>Reverse: 5'-GCGCGAGTCCTTCAATTCAT-3'        |
| ABCG2 | Forward: 5'-TGAGCCTACAACCTGGCTTAGA-3'<br>Reverse: 5'-CCCTGCTTAGACATCCTTTTCAG-3'    |
| FAK   | Forward: 5'-GCTTACCTTGACCCCAACTTG-3'<br>Reverse: 5'-ACGTTCCATACCAGTACCCAG-3'       |
| YAP   | Forward: 5'-TAGCCCTGCGTAGCCAGTTA-3'<br>Reverse: 5'-TCATGCTTAGTCCACTGTCTGT-3'       |
| Bcl2  | Forward: 5'-GAACTGGGGGAGGATTGTGG-3'<br>Reverse: 5'-CCGGTTCAGGTAAGTCAAGTCA-3'       |
| GAPDH | Forward: 5'-AAATTCCATGGCACCCTCAAGGCT-3'<br>Reverse: 5'-CTCATGGTTCACACCCATGACGAA-3' |

## Supplementary Figures

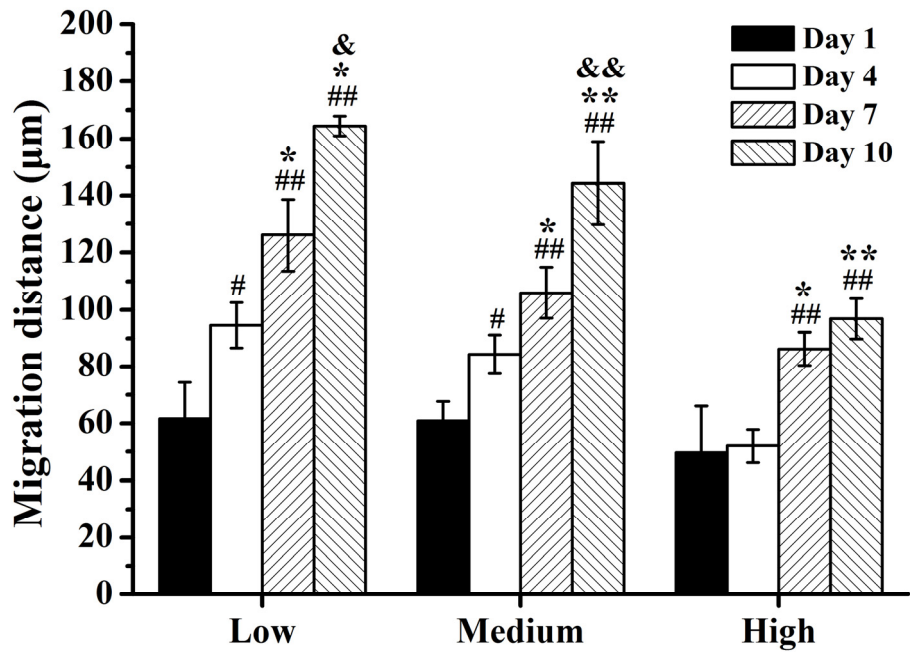

**Fig. S1.** Statistics of cells maximum migration distance in the scaffold. #  $P < 0.05$  and ##  $P < 0.01$  represent significant and extremely significant difference compared to that of Day 1; \*  $P < 0.05$  and \*\*  $P < 0.01$  represent significant and extremely significant difference compared to that of Day 4; &  $P < 0.05$  and &&  $P < 0.01$  represent significant and extremely significant difference compared to that of Day 7.  $n = 3$ .

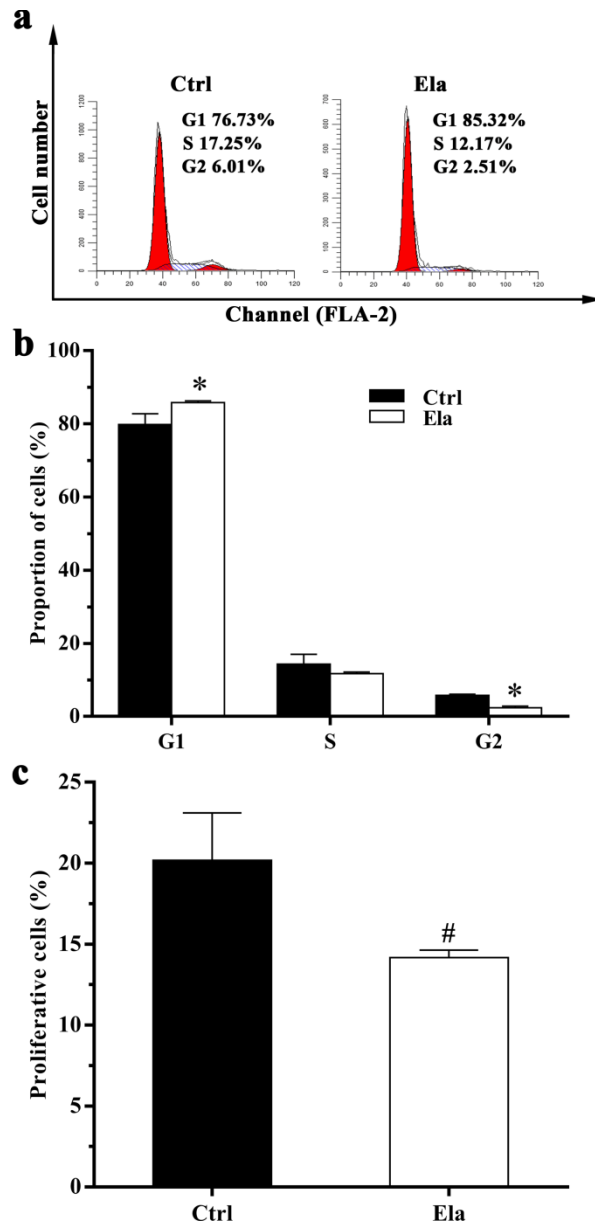

**Fig. S2.** The cell cycle of MDA-MB-231 cells cultured in the DECM scaffold with high stiffness before and after treated with 2 $\mu$ M elacridar. (a) The typical graph of cell cycle. (b) Statistical data of cell cycle (n = 3). \*  $P < 0.05$  represents statistically significant difference compared with the group without elacridar treatment in the same cell cycle. (c) Statistical data of cell proliferation (n = 3). #  $P < 0.05$  represents statistically significant difference compared with the group without elacridar treatment. Statistical significance was determined by ANOVA followed by Tukey's post hoc test. Ctrl: group without elacridar treatment. Ela: group treated with 2  $\mu$ M elacridar.

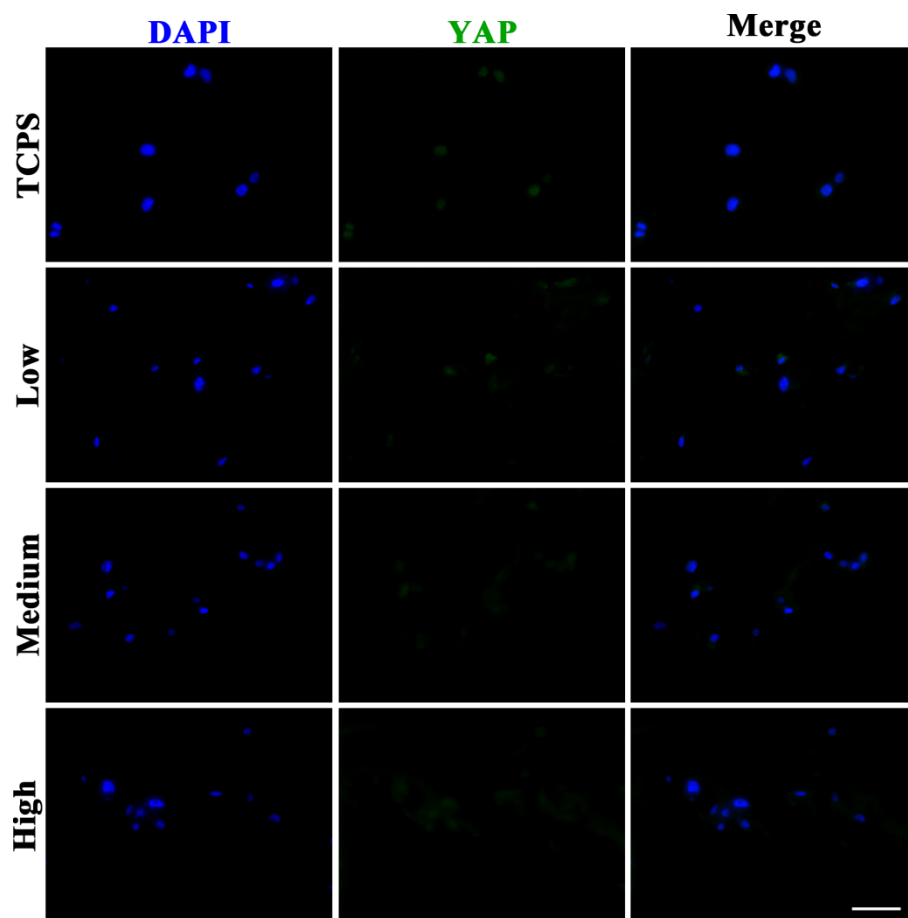

**Fig. S3.** Immunofluorescence detection of YAP expression for repopulation cultured in DECM scaffolds with different stiffness for 10 days. Scale bar: 50  $\mu\text{m}$ . Low: low stiffness group; Medium: medium stiffness group; High: high stiffness group. Samples were fixed with 4% (v/v) paraformaldehyde for 20 min at room temperature, and then permeabilized with 0.25% (v/v) TritonX-100 in PBS for 15 min. After being blocked with normal goat serum (Boster, China) for 20 min at room temperature, the samples were incubated with mouse YAP antibody (1:100, Santa Cruz, USA) at 4°C overnight. Finally, the samples were incubated with DAPI solution (Solarbio, China) for 10 min and captured by an inverted fluorescence microscope (Olympus IX71, Japan).
